# Supplementary figures and images for: Andrographolide Attenuates Gut-Brain-Axis Associated Pathology in Gulf War Illness by Modulating Bacteriome-Virome Associated Inflammation and Microglia-Neuron Proinflammatory Crosstalk
Source: MDPI journal article supplement (doi:10.3390/brainsci11070905), 2021-07-09

**Supplementary Fig. 1**

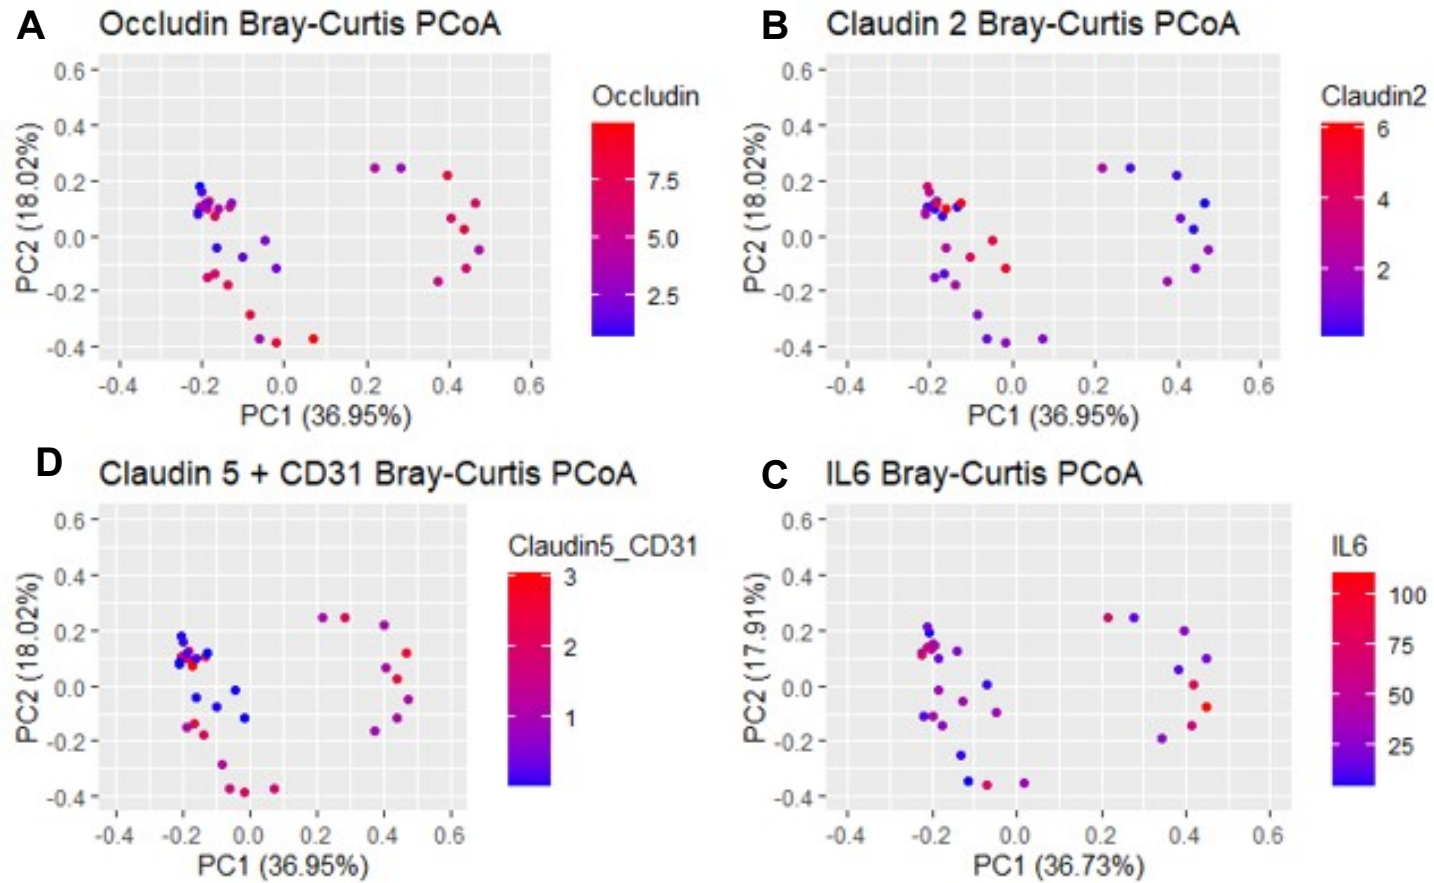

Supplementary Fig. 2

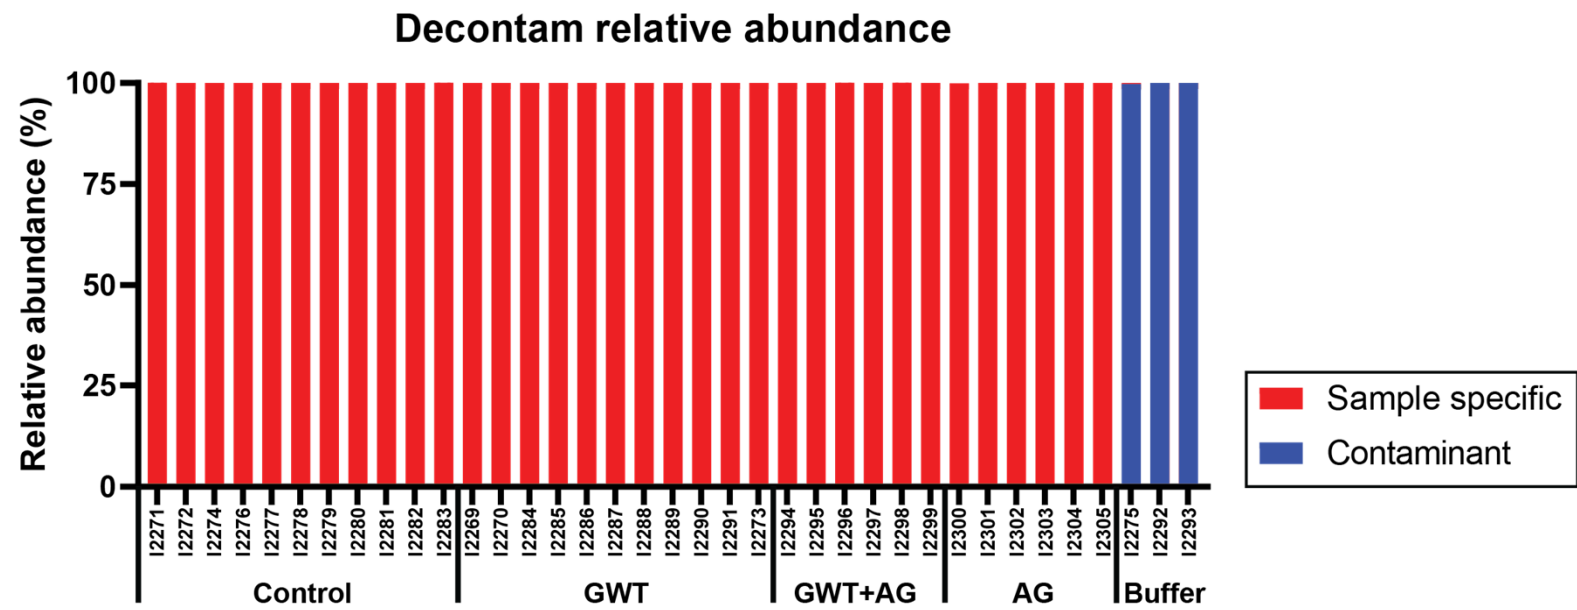

Supplement: s1 [file s1]
